# 1 **Viral infection enhances vomocytosis of intracellular fungi via Type I** 2 **interferons**

3 *Paula I Seoane<sup>1</sup>, Leanne M. Taylor-Smith<sup>1</sup>, David Stirling<sup>2</sup>, Lucy C. K. Bell<sup>2</sup>, Mahdad*  
4 *Noursadeghi<sup>2</sup>, Dalan Bailey<sup>3</sup>, Robin C. May<sup>1\*</sup>*

5

6 *<sup>1</sup>Institute of Microbiology & Infection and School of Biosciences, University of Birmingham,*  
7 *Edgbaston, Birmingham, B15 2TT, UK*

8 *<sup>2</sup>Division of Infection and Immunity, University College London, Gower Street, London WC1E*  
9 *6BT, UK*

10 *<sup>3</sup>The Pirbright Institute, Ash Rd, Surrey, GU24 0NF, UK*

11

12 *\*Correspondence to: r.c.may@bham.ac.uk*

13

## 14 **Abstract**

15 *Cryptococcus neoformans* is an opportunistic human pathogen, which causes serious disease  
16 in immunocompromised hosts. Infection with this pathogen is particularly relevant in HIV<sup>+</sup>  
17 patients, where it leads to around 200,000 deaths *per annum*. A key feature of cryptococcal  
18 pathogenesis is the ability of the fungus to survive and replicate within the phagosome of  
19 macrophages, as well as its ability to escape via a novel non-lytic mechanism known as  
20 vomocytosis. We have been exploring whether viral infection affects the interaction between  
21 *C. neoformans* and macrophages. Here we show that viral infection enhances cryptococcal  
22 vomocytosis without altering phagocytosis or intracellular proliferation of the fungus. This  
23 effect occurs with distinct, unrelated human viral pathogens and is recapitulated when  
24 macrophages are stimulated with the anti-viral cytokine interferon alpha (IFN $\alpha$ ). Importantly,  
25 the effect is abrogated when type-I interferon signalling is blocked, thus underscoring the

26 importance of type-I interferons in this phenomenon. Our results highlight the importance of  
27 incorporating specific context cues while studying host-pathogen interactions. By doing so, we  
28 found that acute viral infection may trigger the release of latent cryptococci from intracellular  
29 compartments, with significant consequences for disease progression.

30

### 31 **Non-Technical Author Summary**

32 Infectious diseases are typically studied in the laboratory in isolation, but in real life people  
33 often encounter multiple infections simultaneously. Here we investigate how the innate  
34 immune response to the fatal fungus *Cryptococcus neoformans* is influenced by viral  
35 coinfection. Whilst virally-infected macrophages retain a normal capacity to engulf and kill  
36 Cryptococci, they demonstrate a dramatically enhanced propensity to expel them via the  
37 process known as non-lytic expulsion or vomocytosis. Activation of vomocytosis is  
38 independent of the type of virus encountered, since both HIV and measles (two entirely  
39 unrelated viral pathogens) trigger the same effect. Instead it is driven by interferon- $\alpha$ , a generic  
40 ‘antiviral’ response, which signals back to the infected macrophage, triggering expulsion of the  
41 fungus. We propose that this hitherto unobserved phenomenon represents a ‘reprioritisation’  
42 pathway for innate immune cells, by which they can alter the frequency with which they expel  
43 one pathogen (*Cryptococcus*) depending on the level of threat from a secondary viral infection.

44

## 45 **Introduction**

46

47 Since their discovery in 1957 by Isaacs and Lindenmann (1), the antiviral effects of type I  
48 interferons have been well documented (2-4). More recently, their roles in non-viral infections  
49 have been investigated (5, 6). Different bacterial stimuli have been shown to elicit type I  
50 interferon production, and in turn these so called “antiviral cytokines” play a role in the  
51 outcome of bacterial infections (7-9). This stems in part from the complex and sometimes  
52 contradictory effects that type I interferons have on host cells, for instance in enhancing  
53 inflammatory responses in some infectious settings (6) to preventing hyperinflammation in  
54 others (10, 11), and even affecting the priming of immune responses at lymph nodes (12).

55

56 To date, little is known about the interplay between type I interferons and fungal infections,  
57 despite the fact that many life-threatening fungal infections occur in the context of chronic viral  
58 infection. This is particularly true of *Cryptococcus neoformans*, a globally distributed  
59 opportunistic pathogen that is responsible for nearly 200,000 deaths per year in human  
60 immunodeficiency virus (HIV) infected people, where it causes cryptococcal meningitis (13).  
61 Extensive work over many years has demonstrated that a key feature of cryptococcal  
62 pathogenesis is the ability of the fungus to survive, proliferate within, and then escape from,  
63 host macrophages (14-17). Macrophages are among the first immune cells to encounter the  
64 fungus within the human host (18) , and thus are very important in the fight against this  
65 pathogen. These cells are able to phagocytose and contain the threat, as happens in  
66 immunocompetent hosts, but can also be hijacked by Cryptococcal cells and used as a “Trojan  
67 horse” to disseminate to distal sites within the body, particularly to the central nervous system  
68 (19). Engulfed Cryptococcal cells can escape from host macrophages through lytic or non-lytic  
69 mechanisms, the latter being known as vomocytosis or non-lytic extrusion (20, 21). Most

70 studies to date have focused on the interaction of *Cryptococcus* with healthy host cells, and  
71 consequently how this intracellular lifestyle may be impacted by viral coinfection remains  
72 unknown.

73

74 Here we show that viral infections enhance vomocytosis of *Cryptococci* from infected  
75 macrophages, without affecting phagocytosis or intracellular proliferation rate of the fungus.

76 This effect is lost when signalling through the type I interferon receptor is blocked, and can be  
77 recapitulated by addition of exogenous IFN $\alpha$ . Thus, antiviral responses by the host have a  
78 hitherto unexpected impact on the release of intracellular pathogens by vomocytosis.

## 79 **Materials and Methods**

80 All reagents were purchased from SIGMA unless otherwise stated.

81

### 82 ***Cryptococcus* Strains**

83 Cryptococcal strains were grown in Yeast Peptone Dextrose (YPD) broth (2% glucose, 1%  
84 peptone and 1% yeast extract) at 25°C on a rotator (20 rpm). Yeast from overnight cultures  
85 were centrifuged at 6500 rpm for 2 minutes and resuspended in PBS at the required  
86 concentration. All experiments were carried out using *C. neoformans* var. *grubii* serotype A  
87 strain Kn99 $\alpha$ . Wildtype, GFP- (22) or mCherry-expressing (23) derivatives of Kn99 $\alpha$  were  
88 used, as stated for each figure.

89

### 90 **Virus strains**

91 HIV-1 virus stocks were generated by transfection of human embryonic kidney 293T cells  
92 (European Collection of Authenticated Cell Cultures) as previously described (24, 25). The  
93 R9HIV $\Delta env$  virus was derived from clade B HIV-1 strain (NL43) with 500bp deletion in *env*,  
94 pseudotyped with vesiculostomatitis virus G envelope. SIV3mac single round virus like  
95 particles (VLPs) containing vpx (SIV3vpx) were generated by transfection into 293T cells with  
96 pSIV3+ and pMDG plasmids (26, 27). At 48, 72h and 96h viral containing supernatant was  
97 harvested, centrifuged at 800 x g for 10 min and filtered through 0.45  $\mu$ m filter then centrifuged  
98 on a 20% sucrose cushion at 20,000 x g for 2h at 4°C. Purified virus was then re-suspended in  
99 RPMI media and frozen at -80°C. To quantify single round HIV infection, a vial was thawed  
100 for each harvest and serial dilutions used to infect CCR5/CD4 and CXCR4/CD4 transfected  
101 NP-2 cells. At 72h post infection wells were fixed in ice cold acetone-methanol and infected  
102 cells were identified by staining for p24 protein using a 1:1 mixture of the anti-p24 monoclonal  
103 antibodies EVA365 and EVA366 (NIBSC, Center for AIDS Reagents, UK). Infected cells

104 were detected by light microscopy to provide a virus titre (focus-forming U/mL). The SIV3vpx  
105 particles were quantified after thawing using a reverse transcriptase (RT) assay colorimetric kit  
106 (Roche) following the manufacturer's instructions to provide a RT ng/mL titre.

107

108 Recombinant MeV strain IC323 expressing green fluorescent protein (MeV-GFP) was  
109 generated as previously reported by Hashimoto *et al.* (28) MeV-GFP represents a virulent field  
110 isolate from Japan (Ichinose-B (IC-B) strain) and was isolated from a patient with acute  
111 measles in 1984 (29). For the generation of virus stocks, Vero (ATCC CCL-81) cells  
112 overexpressing human SLAMF1 receptor (vero-hSLAM cells) were grown in T75 tissue  
113 culture flasks to approximately 80% confluency in DMEM supplemented with 0.4 mg/mL  
114 G418. Flasks were infected with MeV-GFP at an MOI of 0.01:1 in 5 mL media for 1 hour at  
115 37°C. After 1h a further 10 mL of DMEM supplemented with 10% FBS was added and  
116 infection allowed to continue for 48 h. At harvest the flasks were frozen to -80°C. After  
117 thawing, the collected supernatants were centrifuged at 2500 rpm for 10 min at 4°C to pellet  
118 cell debris. Aliquoted virus in supernatant was then frozen to -80°C. MeV-GFP viruses were  
119 then titred using the TCID-50 method. Vero-hSLAM cells were seeded into flat-bottomed 96  
120 well plates and infected with serial dilutions of thawed MeV-GFP in triplicate. After 72 h,  
121 wells were scored for positive or negative infection under UV illumination on a Nikon TE-  
122 2000 microscope.

123

#### 124 **Ethics Statement**

125 All work with human tissue was approved by the University of Birmingham Ethics Committee  
126 under reference ERN\_10-0660. Samples were collected specifically for this work and were not  
127 stored beyond the duration of the experiments described herein. All donors provided written  
128 consent prior to donation.

129

### 130 **Human macrophage isolation and culture**

131 20-40 mL of blood were drawn from healthy donors by venepuncture. 6 mL of whole blood  
132 were carefully layered on top of a double layer of Percoll (densities of 1.079 and 1.098 g/mL).  
133 Samples were centrifuged in a swing bucket rotor at 150g for 8 minutes, followed by 10  
134 minutes at 1200g, with acceleration and break set to zero. The resulting white disc of peripheral  
135 blood mononuclear cells (PBMC) was transferred to a clean vial and incubated with red blood  
136 cell lysis buffer at a ratio of 1:3 for 3 minutes, with gentle mixing throughout to prevent clot  
137 formation. Cells were then washed with ice cold PBS twice, with centrifugation at 400g for 6  
138 minutes in between each wash, and counted with a haemocytometer.  $1 \times 10^6$  PBMC were seeded  
139 onto 48-well plates in RPMI-1640 media containing 1% penicillin/streptomycin, 5% heat-  
140 inactivated AB human serum and 20 ng/mL M-CSF (Invitrogen). Cells were washed with PBS  
141 and resuspended in fresh media on days 3 and 6 of differentiation. Macrophages were ready to  
142 use on day 7. A yield of  $1 \times 10^5$  macrophages per well was estimated.

143

### 144 ***Cryptococcus* infection**

145 Fungi were opsonised with 10% human AB serum or 18B7 antibody (a kind gift from Arturo  
146 Casadevall) for 1 hour and then added to macrophages at a multiplicity of infection of 10:1.  
147 Infection was carried out in serum free-media, at 37°C with 5% CO<sub>2</sub>. After 2 hours, cells were  
148 washed 3 times with PBS to remove any extracellular fungi and fresh serum free-media was  
149 added.

150

### 151 **Drug treatments**

152 Exogenous compounds were added to macrophages at two stages; when infecting with  
153 *Cryptococcus* and again when replenishing with fresh media after removing extracellular fungi.

154 Compounds tested include interferon alpha (IFN $\alpha$ ) at concentrations ranging from 5 to 100  
155 pg/mL (Bio-Techne), polyinosinic-polycytidilic acid (polyIC) at 3 and 30 ng/mL (Invivogen),  
156 type-I interferon receptor inhibitor (IFNARinh) at 2.5  $\mu$ g/mL (pbl assay science).

157

### 158 **Co-infection assay**

159 Human monocyte-derived macrophages were infected with either attenuated human  
160 immunodeficiency virus (HIV) or MeV-GFP as follows:

161 For attenuated HIV co-infections, 24h before cryptococcal infection, human monocyte-derived  
162 macrophages were infected either with R9HIV $\Delta$ env at a MOI of 10:1, SIV3vpx at 3 ng/mL or  
163 both in serum free RPMI. At 24 h post infection duplicate wells were fixed in ice cold acetone-  
164 methanol and infected cells were identified by staining for p24 protein as described above.

165 Experimental wells were infected with antibody opsonised-*Cryptococcus* Kn99 $\alpha$ -GFP for 2  
166 hours, washed to remove extracellular fungal cells, and replenished with fresh serum free-  
167 media.

168

169 Alternatively, macrophages were infected with MeV-GFP at an MOI of 5:1 in serum free-  
170 media and kept at 37°C with 5% CO<sub>2</sub>. After 24 hours, cells were washed with PBS and fresh  
171 media, supplemented with 5% heat-inactivated human AB serum, was added. After 3 days,  
172 cells were co-infected with serum opsonised-*Cryptococcus* Kn99 $\alpha$ -mCherry for 2 hours,  
173 washed to remove extracellular fungal cells, and replenished with fresh serum free-media.

174

### 175 **Live imaging**

176 Infected samples were kept at 37°C with 5% CO<sub>2</sub> in the imaging chamber of a Ti-E Nikon  
177 Epifluorescence microscope. Images were taken every 5 minutes over an 18-hour period and  
178 compiled into a single movie file using NIS Elements software. Movies were blinded by a third



179 party before manual scoring for phagocytosis of *Cryptococcus*, virus infection rates,  
180 vomocytosis events, intracellular proliferation rates and macrophage integrity.

181

## 182 **Growth curve assay**

183 A 10-fold diluted cryptococcal overnight culture was inoculated into YPD broth in a 48-well  
184 plate (final dilution in well: 1000-fold), in the presence or absence of type-I interferons. The  
185 plate was sealed with a breathable membrane and incubated at 37°C within a fully automated  
186 plate reader (FLUOStar, BMG Omega). Optical density readings at 600 nm were taken every  
187 30 minutes over a 24 hour-period, with orbital shaking in between readings.

188

## 189 **Data analysis**

190 Statistical analysis was performed using GraphPad Prism 6. Categorical data of phagocytosis  
191 or vomocytosis occurrence in the different conditions was assessed using Chi<sup>2</sup> test and Fisher's  
192 exact test. If data was normally distributed as assessed by Shapiro-Wilk test, then it was  
193 compared using Student's t test. Figures show percentage of *cryptococcus*-infected  
194 macrophages experiencing at least one vomocytosis event within each experiment. For  
195 intracellular proliferation rates, data was analysed using Mann-Whitney test. Growth curves  
196 were fitted to sigmoidal curves and the parameters were compared using Kruskal-Wallis test.  
197 All data shown corresponds to at least three independent experiments.

198 Raw data (collated manual counts for multiple timelapse movies) are provided as supplemental  
199 material for each figure. Original timelapse movies, upon which manual scoring was  
200 performed, are freely available upon request from the authors.

## 201 Results

202

203 Given the relevance of cryptococcosis to HIV<sup>+</sup> patients (13), we set out to test whether HIV  
204 infection had an effect on vomocytosis of *C. neoformans*. Human monocyte-derived  
205 macrophages were infected with HIV-1 capable of a single-round of infection and subsequently  
206 with *C. neoformans* and then used for time-lapse imaging over 18 hours. Subsequent scoring  
207 showed that virally infected cells had a significantly higher occurrence of cryptococcal  
208 vomocytosis (Figure 1A), whilst fungal uptake and intracellular proliferation were unaltered  
209 (Figure 1C, 1E).

210

211 The experimental HIV system we used here includes co-transduction with SIV3 $\nu$ px VLPs in  
212 order to counteract the antiviral effect of SAMHD1 and ensure maximal HIV infection of the  
213 macrophages (26, 30) (Figure S1A). Interestingly, we noted that the addition of SIV3 $\nu$ px or  
214 R9HIV $\Delta$ env alone also increased vomocytosis (Figure S1B). Since neither condition results  
215 in widespread viral infection of host cells, this suggested that the enhancement of vomocytosis  
216 occurs at the level of viral detection, rather than being a consequence of active HIV infection.

217

218 To explore this further, we tested whether vomocytosis was altered in macrophages infected  
219 with an unrelated macrophage-tropic virus (31); measles (MeV, Figure 1B). The measles strain  
220 used represents a virulent field isolate from Japan. Once again, infection with the virus resulted  
221 in significantly enhanced vomocytosis of *Cryptococcus*. Neither HIV nor measles infection  
222 affected uptake of *Cryptococcus* nor the intracellular proliferation rate (IPR) of the fungus  
223 (Figure 1C-F), suggesting that the viral effect acts specifically at the level of vomocytosis,  
224 rather than fungal pathogenicity *per se*, and that it is independent of the type of virus.

225

226 To test whether active viral infection was required for enhanced vomocytosis, we mimicked  
227 the effect of viral exposure by stimulating macrophages with polyinosinic-polycytidilic acid  
228 (polyIC). PolyIC is a double-stranded RNA synthetic analogue, which is known to trigger  
229 antiviral responses by binding to TLR3 (32). Human monocyte-derived macrophages were  
230 stimulated with polyIC and infected with *C. neoformans* simultaneously. Infected cells were  
231 imaged over 18 hours and scored for vomocytosis (Figure 2A). As with HIV or MeV infection,  
232 polyIC stimulation enhanced vomocytosis of *Cryptococcus*. Thus, it is likely that the antiviral  
233 reaction of the host macrophage, rather than an aspect of viral pathogenesis, is the trigger for  
234 enhanced vomocytosis from infected host cells.

235

236 The hallmark of the cellular anti-viral response is the induction of type-I interferons. Among  
237 these, the best studied are IFN $\alpha$  and IFN $\beta$ . During HIV infection specifically, the induction of  
238 IFN $\alpha$  is the most relevant (33). We therefore tested whether the impact of viral infection on  
239 vomocytosis could be recapitulated by exposure to interferon- $\alpha$  (IFN $\alpha$ ). Stimulation of human  
240 monocyte-derived macrophages with 10 pg/mL IFN $\alpha$  (a level that closely matches that seen in  
241 HIV-infected patients (33)) resulted in significantly enhanced vomocytosis of *Cryptococcus*  
242 (Figure 2B) without altering cryptococcal growth, uptake or IPR (Figure S2). Interestingly, we  
243 noticed that higher doses of IFN $\alpha$  suppressed this effect, suggesting that the impact of  
244 interferons on vomocytosis can be rapidly saturated.

245

246 To confirm that type-I interferons were behind the increase in vomocytosis observed, we  
247 performed the viral infection experiments in the presence of a type-I interferon receptor  
248 (IFNAR) inhibitor (Figure 3). The addition of IFNAR inhibitor blocked the enhancement of  
249 vomocytosis otherwise elicited by viral infection in both HIV- and Measles-infection settings,  
250 confirming that type-I interferon signalling is necessary for this effect. Interestingly, this effect

251 was particularly prominent on virally infected cells rather than neighbouring cells which were  
252 not infected (Non-MeV; Figure 3B), suggesting that the impact of IFN $\alpha$  signalling on  
253 vomocytosis is highly localised and specific to the autocrine responses occurring within  
254 infected cells, rather than endocrine responses mediated through cytokines.

## 255 Discussion

256

257 In this study we set out to explore the consequences, if any, of viral infection on Cryptococcal  
258 infection, focusing on the non-lytic escape mechanism known as vomocytosis. Infection with  
259 either HIV or measles virus led to an enhancement in vomocytosis of *C. neoformans*, without  
260 affecting uptake or intracellular proliferation of the fungus (Figure 1), an effect that could be  
261 recapitulated by stimulation with IFN $\alpha$  and abrogated when signalling from type-I interferon  
262 receptor was blocked (Figures 2 and 3). Thus, viral coinfection stimulates expulsion of  
263 intracellular fungi via Type I interferon signalling.

264

265 The effect was seen using two distinct viral pathogens which differ, among other parameters,  
266 in the magnitude of anti-viral response they elicit in human macrophages. Relative to other  
267 viral infections, HIV is very good at avoiding the induction of type-I interferons (24, 25).  
268 Nonetheless, the low levels of type-I interferons induced by HIV, potentially enhanced by the  
269 co-infection with *Cryptococcus*, are sufficient to have a significant effect on vomocytosis.  
270 Infection with measles virus has been reported to induce limited production of type-I  
271 interferons in macaque models, albeit with potent induction of interferon-stimulated genes (34,  
272 35). To date, there is no direct correlation between measles infection and cryptococcosis.  
273 However, given that both pathogens have a distinct respiratory phase it is possible that they  
274 interact within this shared niche, potentially through low doses of antiviral signalling.

275

276 Why might antiviral signalling induce vomocytosis? One possibility is that vomocytosis serves  
277 to “reset” phagocytes that have been unable to kill their prey, thus allowing them to serve a  
278 useful purpose in phagocytosing other pathogens rather than remaining “unavailable”. In that  
279 context, a potent inflammatory signal such as IFN $\alpha$  may serve to accelerate this process during

280 localised infection, returning macrophages to functionality faster than would otherwise occur.  
281 The consequences of vomocytosis on disease progression, however, are likely to be highly  
282 context dependent; in some settings, this may enable a more robust immune response, but in  
283 others it may serve to inadvertently disseminate the fungus to distal sites.

284

285 This is supported by previous reports showing variable outcomes of interferon signalling on  
286 cryptococcal infection in mice. Sato *et al.* (36) showed that IFNARKO mice have lower fungal  
287 burden than WT mice and consequently argue that type-I interferon signalling is detrimental  
288 for the host during cryptococcal infection. Supporting this notion but using the sister species  
289 *C. gatti*, Oliveira *et al* (37) show that infection with influenza virus worsens the prognosis of  
290 subsequent fungal infection. On the other hand, Sionov *et al* (38) showed that stimulation with  
291 IFN $\alpha$  or with the double-stranded RNA analogue pICLC protected the host from infection by  
292 either *C. neoformans* or *C. gatti* infection. This effect was time-dependent, with the protective  
293 effect of pICLC treatment only occurring if administered during the first 72 hpi before the  
294 fungus reaches the brain. A tempting model, therefore, is that stimulating vomocytosis via  
295 antiviral signalling early in infection (when the fungus remains in the lung) helps prevent  
296 dissemination, whilst triggering vomocytosis later on may actually enhance fungal spread and  
297 accelerate disease progression.

298

299 Taken together, our findings therefore suggest that the antiviral response, and IFN $\alpha$  in  
300 particular, induce the expulsion of intracellular cryptococci and that this effect could be  
301 advantageous or detrimental to the host, depending on the localization of the infected  
302 phagocyte and timing of the event.

303

304 **Acknowledgments**

305 PIS, LMTS and RCM are supported by funding from the European Research Council under  
306 the European Union's Seventh Framework Programme (FP/2007-2013)/ERC Grant  
307 Agreement No. 614562. RCM holds a Wolfson Royal Society Research Merit Award and PIS  
308 is supported by a Darwin Trust scholarship. MN is supported by a Wellcome Trust Investigator  
309 Award (207511/Z/17/Z) and the NIHR Biomedical Research Centre at University College  
310 London Hospitals.

311

## 312 **References**

313

314 1. Isaacs A, Lindenmann J. Virus interference. I. The interferon. Proc R Soc Lond B Biol  
315 Sci. 1957;147(927):258-67.

316 2. Haller O, Arnheiter H, Gresser I, Lindenmann J. Virus-specific interferon action.  
317 Protection of newborn Mx carriers against lethal infection with influenza virus. J Exp Med.  
318 1981;154(1):199-203.

319 3. Muller U, Steinhoff U, Reis LF, Hemmi S, Pavlovic J, Zinkernagel RM, et al.  
320 Functional role of type I and type II interferons in antiviral defense. Science.  
321 1994;264(5167):1918-21.

322 4. Yan N, Chen ZJ. Intrinsic antiviral immunity. Nat Immunol. 2012;13(3):214-22.

323 5. MacMicking JD. Interferon-inducible effector mechanisms in cell-autonomous  
324 immunity. Nat Rev Immunol. 2012;12(5):367-82.

325 6. Mancuso G, Midiri A, Biondo C, Beninati C, Zummo S, Galbo R, et al. Type I IFN  
326 signaling is crucial for host resistance against different species of pathogenic bacteria. J  
327 Immunol. 2007;178(5):3126-33.

328 7. Bergstrom B, Aune MH, Awuh JA, Kojen JF, Blix KJ, Ryan L, et al. TLR8 Senses  
329 Staphylococcus aureus RNA in Human Primary Monocytes and Macrophages and Induces  
330 IFN-beta Production via a TAK1-IKKbeta-IRF5 Signaling Pathway. J Immunol.  
331 2015;195(3):1100-11.

332 8. Kagan JC, Su T, Horng T, Chow A, Akira S, Medzhitov R. TRAM couples endocytosis  
333 of Toll-like receptor 4 to the induction of interferon-beta. Nat Immunol. 2008;9(4):361-8.

334 9. Mancuso G, Gambuzza M, Midiri A, Biondo C, Papasergi S, Akira S, et al. Bacterial  
335 recognition by TLR7 in the lysosomes of conventional dendritic cells. Nat Immunol.  
336 2009;10(6):587-94.



- 337 10. Castiglia V, Piersigilli A, Ebner F, Janos M, Goldmann O, Dambock U, et al. Type I  
338 Interferon Signaling Prevents IL-1beta-Driven Lethal Systemic Hyperinflammation during  
339 Invasive Bacterial Infection of Soft Tissue. *Cell Host Microbe*. 2016;19(3):375-87.
- 340 11. Gratz N, Hartweiger H, Matt U, Kratochvill F, Janos M, Sigel S, et al. Type I interferon  
341 production induced by *Streptococcus pyogenes*-derived nucleic acids is required for host  
342 protection. *PLoS Pathog*. 2011;7(5):e1001345.
- 343 12. Webb LM, Lundie RJ, Borger JG, Brown SL, Connor LM, Cartwright AN, et al. Type  
344 I interferon is required for T helper (Th) 2 induction by dendritic cells. *EMBO J*.  
345 2017;36(16):2404-18.
- 346 13. Rajasingham R, Smith RM, Park BJ, Jarvis JN, Govender NP, Chiller TM, et al. Global  
347 burden of disease of HIV-associated cryptococcal meningitis: an updated analysis. *Lancet*  
348 *Infect Dis*. 2017;17(8):873-81.
- 349 14. Alvarez M, Casadevall A. Cell-to-cell spread and massive vacuole formation after  
350 *Cryptococcus neoformans* infection of murine macrophages. *BMC Immunol*. 2007;8:16.
- 351 15. Feldmesser M, Kress Y, Novikoff P, Casadevall A. *Cryptococcus neoformans* is a  
352 facultative intracellular pathogen in murine pulmonary infection. *Infect Immun*.  
353 2000;68(7):4225-37.
- 354 16. Tucker SC, Casadevall A. Replication of *Cryptococcus neoformans* in macrophages is  
355 accompanied by phagosomal permeabilization and accumulation of vesicles containing  
356 polysaccharide in the cytoplasm. *Proc Natl Acad Sci U S A*. 2002;99(5):3165-70.
- 357 17. Voelz K, May RC. Cryptococcal interactions with the host immune system. *Eukaryot*  
358 *Cell*. 2010;9(6):835-46.
- 359 18. Osterholzer JJ, Milam JE, Chen GH, Toews GB, Huffnagle GB, Olszewski MA. Role  
360 of dendritic cells and alveolar macrophages in regulating early host defense against pulmonary  
361 infection with *Cryptococcus neoformans*. *Infect Immun*. 2009;77(9):3749-58.

- 362 19. Sorrell TC, Juillard PG, Djordjevic JT, Kaufman-Francis K, Dietmann A, Milonig A,  
363 et al. Cryptococcal transmigration across a model brain blood-barrier: evidence of the Trojan  
364 horse mechanism and differences between *Cryptococcus neoformans* var. *grubii* strain H99  
365 and *Cryptococcus gattii* strain R265. *Microbes Infect.* 2016;18(1):57-67.
- 366 20. Alvarez M, Casadevall A. Phagosome extrusion and host-cell survival after  
367 *Cryptococcus neoformans* phagocytosis by macrophages. *Curr Biol.* 2006;16(21):2161-5.
- 368 21. Ma H, Croudace JE, Lammas DA, May RC. Expulsion of live pathogenic yeast by  
369 macrophages. *Curr Biol.* 2006;16(21):2156-60.
- 370 22. Garelnabi M, Taylor-Smith LM, Bielska E, Hall RA, Stones D, May RC. Quantifying  
371 donor-to-donor variation in macrophage responses to the human fungal pathogen *Cryptococcus*  
372 *neoformans*. *PLoS One.* 2018;13(3):e0194615.
- 373 23. Upadhyaya R, Lam WC, Maybruck BT, Donlin MJ, Chang AL, Kayode S, et al. A  
374 fluorogenic *C. neoformans* reporter strain with a robust expression of m-cherry expressed from  
375 a safe haven site in the genome. *Fungal Genet Biol.* 2017;108:13-25.
- 376 24. Rasaiyaah J, Tan CP, Fletcher AJ, Price AJ, Blondeau C, Hilditch L, et al. HIV-1 evades  
377 innate immune recognition through specific cofactor recruitment. *Nature.*  
378 2013;503(7476):402-5.
- 379 25. Tsang J, Chain BM, Miller RF, Webb BL, Barclay W, Towers GJ, et al. HIV-1 infection  
380 of macrophages is dependent on evasion of innate immune cellular activation. *AIDS.*  
381 2009;23(17):2255-63.
- 382 26. Goujon C, Arfi V, Pertel T, Luban J, Lienard J, Rigal D, et al. Characterization of  
383 simian immunodeficiency virus SIVSM/human immunodeficiency virus type 2 Vpx function  
384 in human myeloid cells. *J Virol.* 2008;82(24):12335-45.

- 385 27. Goujon C, Jarrosson-Wuilleme L, Bernaud J, Rigal D, Darlix JL, Cimorelli A. With a  
386 little help from a friend: increasing HIV transduction of monocyte-derived dendritic cells with  
387 virion-like particles of SIV(MAC). *Gene Ther.* 2006;13(12):991-4.
- 388 28. Hashimoto K, Ono N, Tatsuo H, Minagawa H, Takeda M, Takeuchi K, et al. SLAM  
389 (CD150)-independent measles virus entry as revealed by recombinant virus expressing green  
390 fluorescent protein. *J Virol.* 2002;76(13):6743-9.
- 391 29. Takeda M, Takeuchi K, Miyajima N, Kobune F, Ami Y, Nagata N, et al. Recovery of  
392 pathogenic measles virus from cloned cDNA. *J Virol.* 2000;74(14):6643-7.
- 393 30. Mlcochova P, Watters SA, Towers GJ, Noursadeghi M, Gupta RK. Vpx  
394 complementation of 'non-macrophage tropic' R5 viruses reveals robust entry of infectious HIV-  
395 1 cores into macrophages. *Retrovirology.* 2014;11:25.
- 396 31. Allen IV, McQuaid S, Penalva R, Ludlow M, Duprex WP, Rima BK. Macrophages and  
397 Dendritic Cells Are the Predominant Cells Infected in Measles in Humans. *mSphere.*  
398 2018;3(3).
- 399 32. Alexopoulou L, Holt AC, Medzhitov R, Flavell RA. Recognition of double-stranded  
400 RNA and activation of NF-kappaB by Toll-like receptor 3. *Nature.* 2001;413(6857):732-8.
- 401 33. Hardy GA, Sieg S, Rodriguez B, Anthony D, Asaad R, Jiang W, et al. Interferon-alpha  
402 is the primary plasma type-I IFN in HIV-1 infection and correlates with immune activation and  
403 disease markers. *PLoS One.* 2013;8(2):e56527.
- 404 34. Shivakoti R, Siwek M, Hauer D, Schultz KL, Griffin DE. Induction of dendritic cell  
405 production of type I and type III interferons by wild-type and vaccine strains of measles virus:  
406 role of defective interfering RNAs. *J Virol.* 2013;87(14):7816-27.
- 407 35. Shivakoti R, Hauer D, Adams RJ, Lin WH, Duprex WP, de Swart RL, et al. Limited in  
408 vivo production of type I or type III interferon after infection of macaques with vaccine or  
409 wild-type strains of measles virus. *J Interferon Cytokine Res.* 2015;35(4):292-301.

- 410 36. Sato K, Yamamoto H, Nomura T, Matsumoto I, Miyasaka T, Zong T, et al.  
411 *Cryptococcus neoformans* Infection in Mice Lacking Type I Interferon Signaling Leads to  
412 Increased Fungal Clearance and IL-4-Dependent Mucin Production in the Lungs. *PLoS One*.  
413 2015;10(9):e0138291.
- 414 37. Oliveira LVN, Costa MC, Magalhaes TFF, Bastos RW, Santos PC, Carneiro HCS, et  
415 al. Influenza A Virus as a Predisposing Factor for Cryptococcosis. *Front Cell Infect Microbiol*.  
416 2017;7:419.
- 417 38. Sionov E, Mayer-Barber KD, Chang YC, Kauffman KD, Eckhaus MA, Salazar AM, et  
418 al. Type I IFN Induction via Poly-ICLC Protects Mice against Cryptococcosis. *PLoS Pathog*.  
419 2015;11(8):e1005040.
- 420
- 421

## 422 **Figure Captions**

### 423 **Fig 1. Viral infection enhances vomocytosis of *C. neoformans***

424 Human monocyte-derived macrophages were infected with HIV (left) or measles virus (right)  
425 and subsequently infected with *C. neoformans*. Time-lapse microscopy videos were manually  
426 scored for vomocytosis (top), uptake (middle) and intracellular proliferation rate of *C.*  
427 *neoformans* (bottom). **A-B** Graphs show percentage of *cryptococcus*-infected macrophages  
428 which have experienced at least one vomocytosis event. **C-D** Percentage of *cryptococcus*-  
429 infected macrophages. **E-F** Intracellular proliferation rate of *C. neoformans* over 18 hours. In  
430 all cases, data corresponds to at least 3 independent experiments. Categorical vomocytosis and  
431 phagocytosis data was analysed by Chi<sup>2</sup> test followed by Fisher's exact test. \* p < 0.05; \*\*\*\* p  
432 < 0.0001. IPR data was analysed using Mann-Whitney test.

433

### 434 **Fig 2. Antiviral response increases vomocytosis**

435 Human monocyte-derived macrophages were stimulated with different doses of polyIC (**A**) or  
436 IFN $\alpha$  (**B**), and infected with *C. neoformans*. Graphs show Mean + SD of percentage of  
437 *cryptococcus*-infected macrophages which have experienced at least one vomocytosis event.  
438 Chi<sup>2</sup> test followed by Fisher's exact test performed on raw vomocytosis counts. Data  
439 corresponds to at least three independent experiments.

440

### 441 **Fig 3. Type-I interferon signalling is necessary to enhance vomocytosis**

442 Human monocyte-derived macrophages were infected with HIV (**A**) or GFP-expressing  
443 measles virus (MeV-GFP, **B**) and subsequently with mCherry-expressing *C. neoformans*  
444 (Kn99 $\alpha$ -mCherry), in the presence or absence of an IFNAR blocking antibody. GFP negative  
445 cells, which did not have an active Measles infection, were termed "Non-MeV". Graph shows  
446 Mean + SD of percentage of *Cryptococcus*-infected macrophages which have experienced at

447 least one vomocytosis event. Fisher's exact test performed on raw vomocytosis counts. Data  
448 corresponds to two and three biological repeats, respectively.

449

## 450 **Supporting information**

### 451 **Fig S1**

452 **A.** Human monocyte-derived macrophages were infected with VLPs as indicated. After 24  
453 hours, viral infection was assessed by p24 staining (blue).

454 **B.** Cells were infected with VLPs as indicated, and subsequently infected with *C. neoformans*.  
455 Time-lapse microscopy videos were manually scored for vomocytosis. Graph shows  
456 percentage of *cryptococcus*-infected macrophages which have experienced at least one  
457 vomocytosis event. Chi<sup>2</sup> test followed by Fisher's exact test performed on raw vomocytosis  
458 counts from 5 independent experiments.

459

### 460 **Fig S2**

461 **A.** Cryptococcal cells were grown in the presence or absence of IFN $\alpha$  over 24 hours. Growth  
462 was assessed by optical density readings at 600 nm.

463 **B-C.** Human monocyte-derived macrophages were infected with *C. neoformans* in the  
464 presence of different doses of recombinant IFN $\alpha$ . Time-lapse microscopy videos were  
465 manually scored for phagocytosis and intracellular proliferation rate of the fungus (B and C,  
466 respectively).

467 Data corresponds to 3 independent experiments.

468

# HIV infection

# Measles infection

Vomocytosis

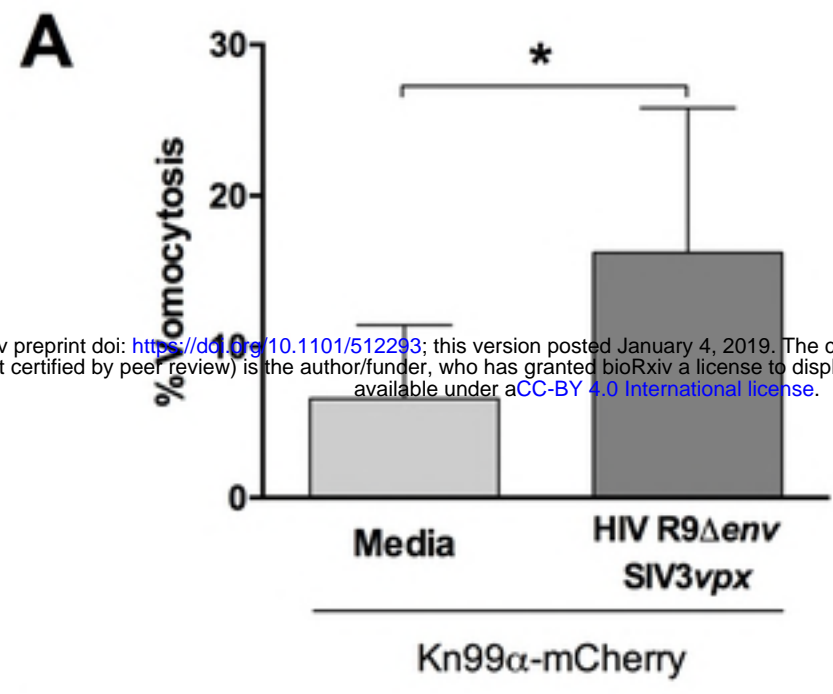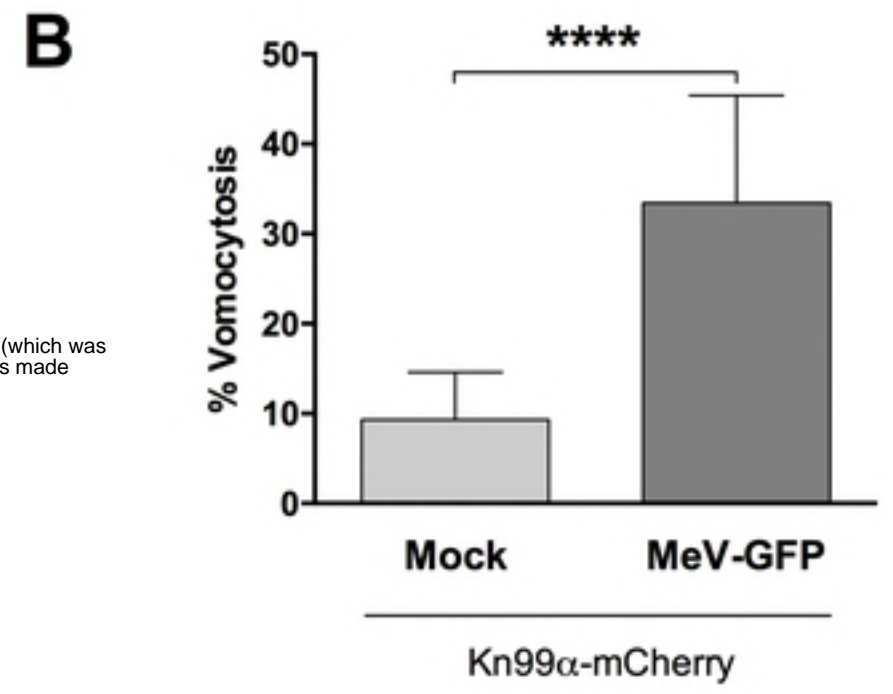

bioRxiv preprint doi: <https://doi.org/10.1101/512293>; this version posted January 4, 2019. The copyright holder for this preprint (which was not certified by peer review) is the author/funder, who has granted bioRxiv a license to display the preprint in perpetuity. It is made available under aCC-BY 4.0 International license.

Phagocytosis

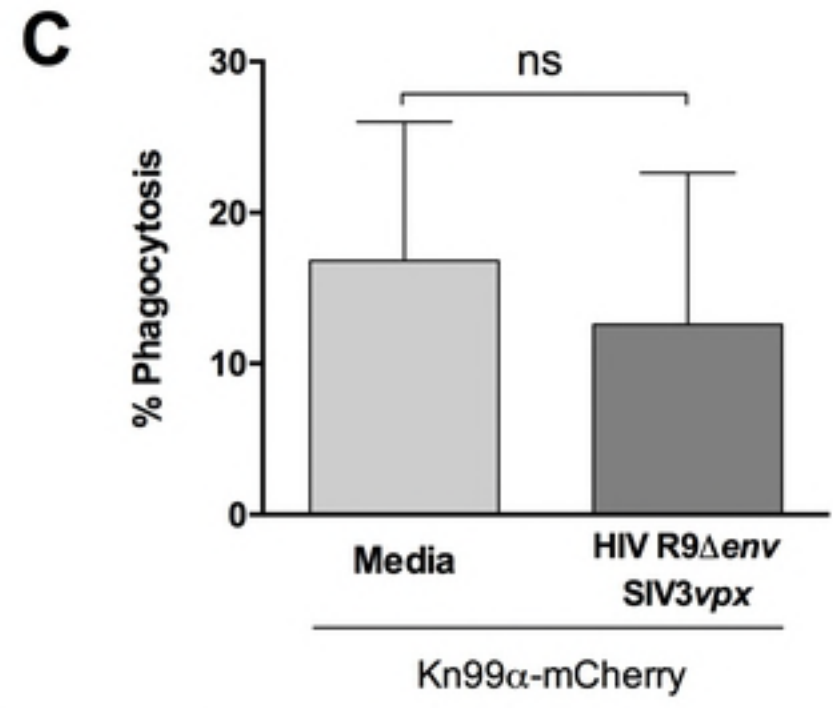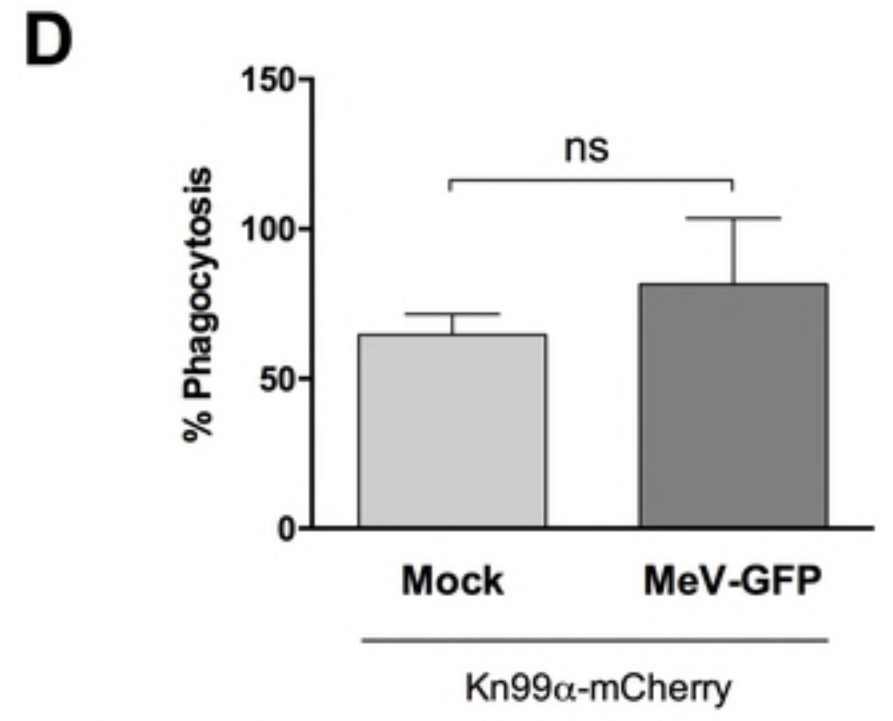

Intracellular Proliferation

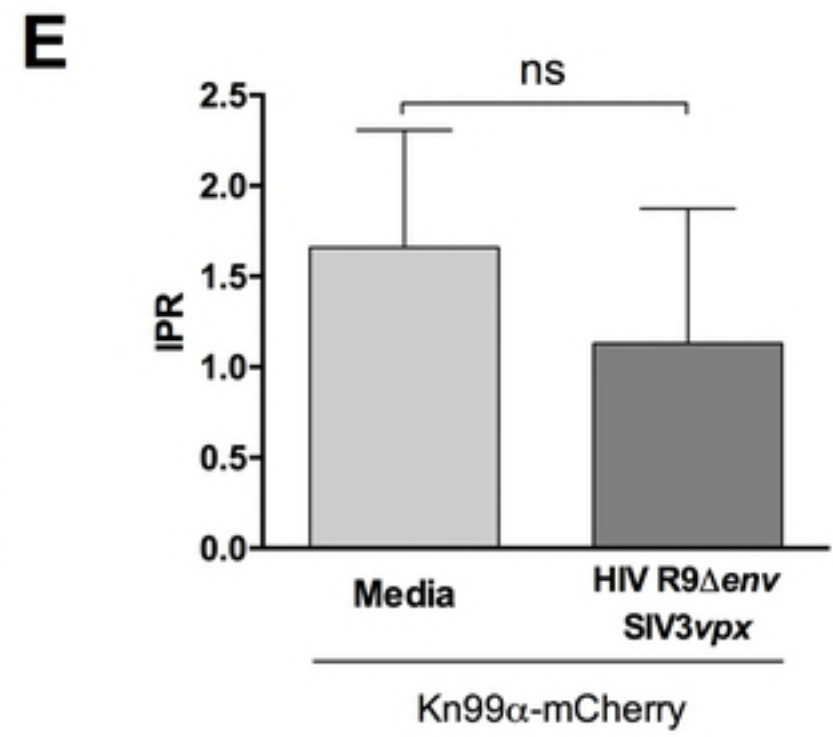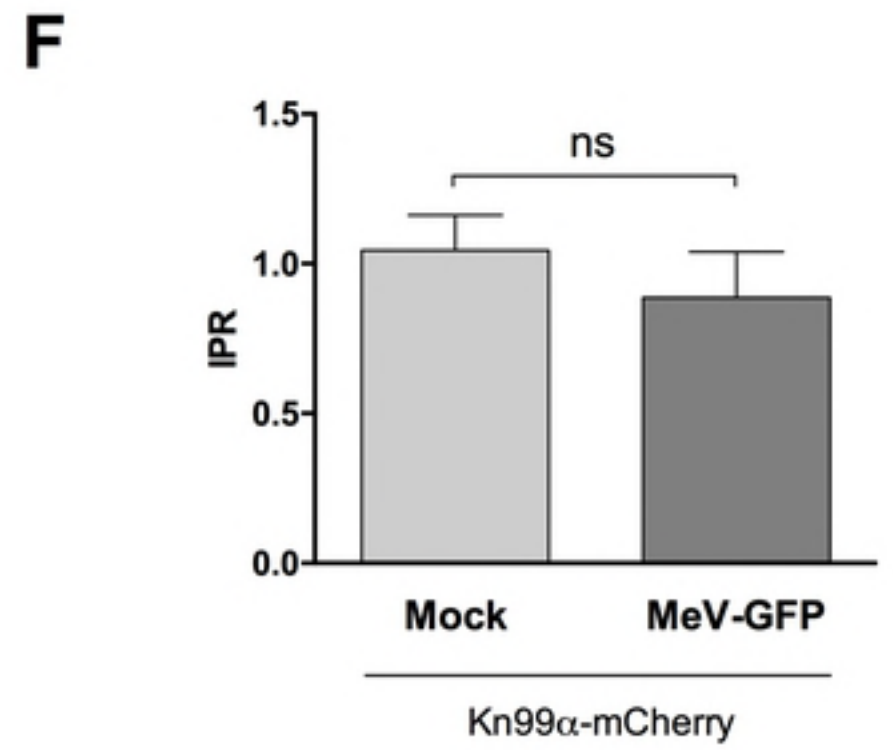

Figure 1

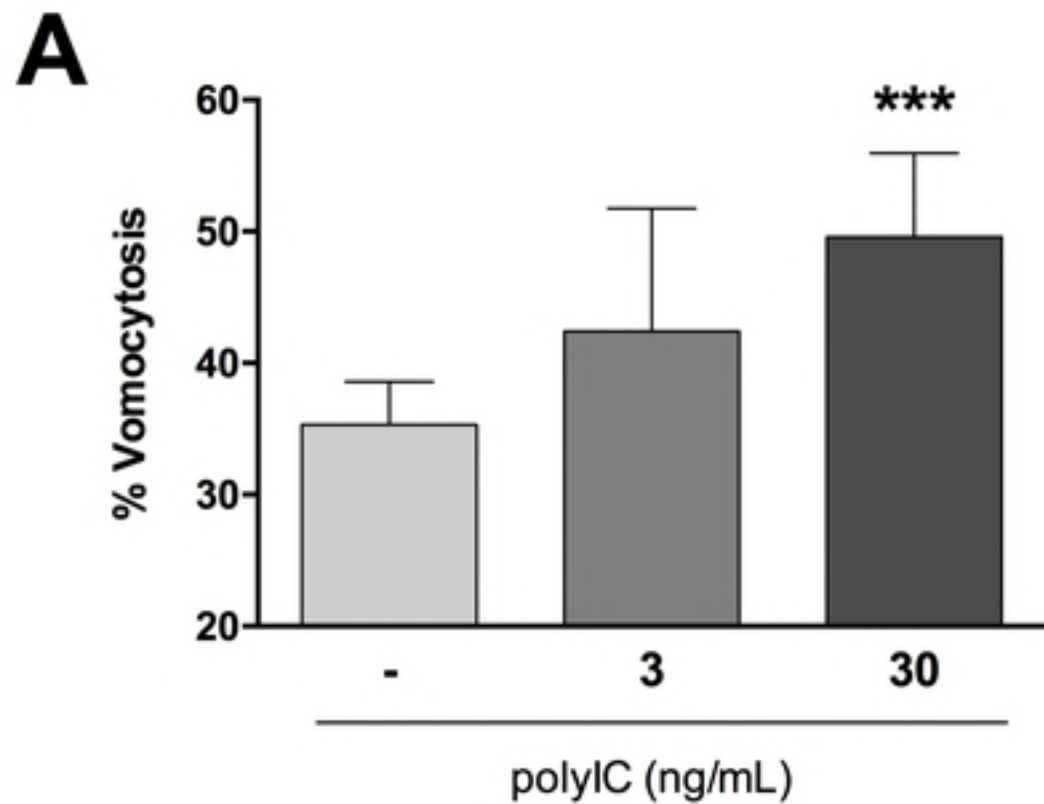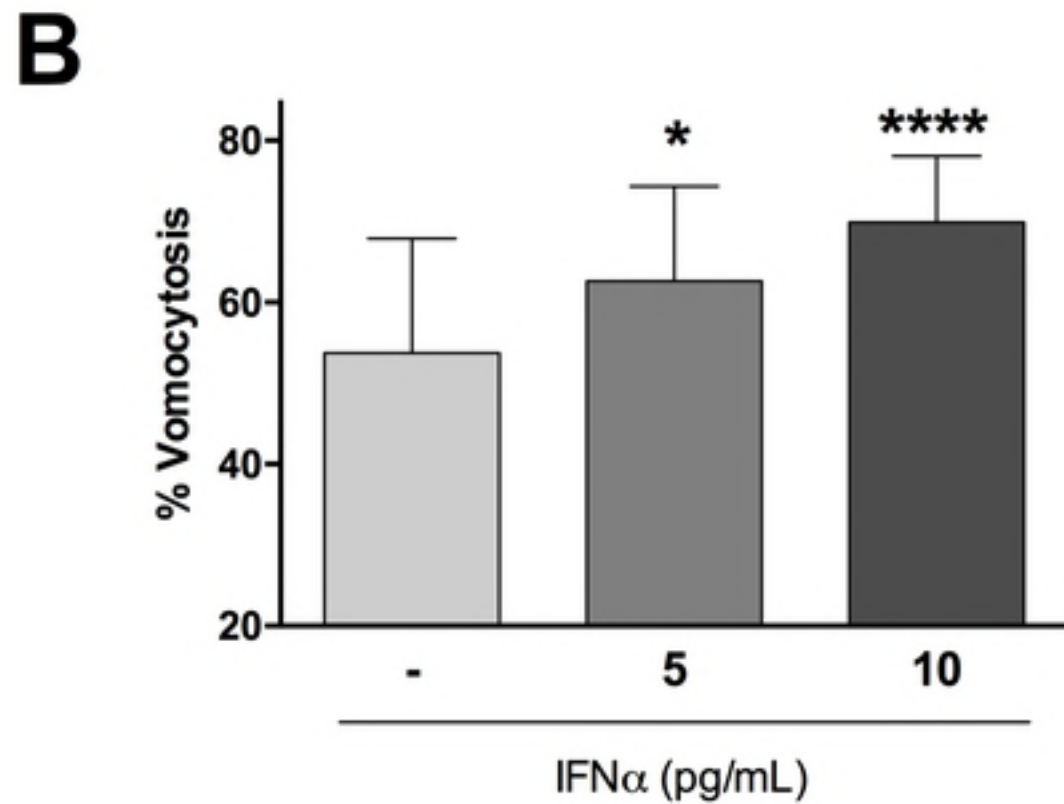

Figure 2



**A**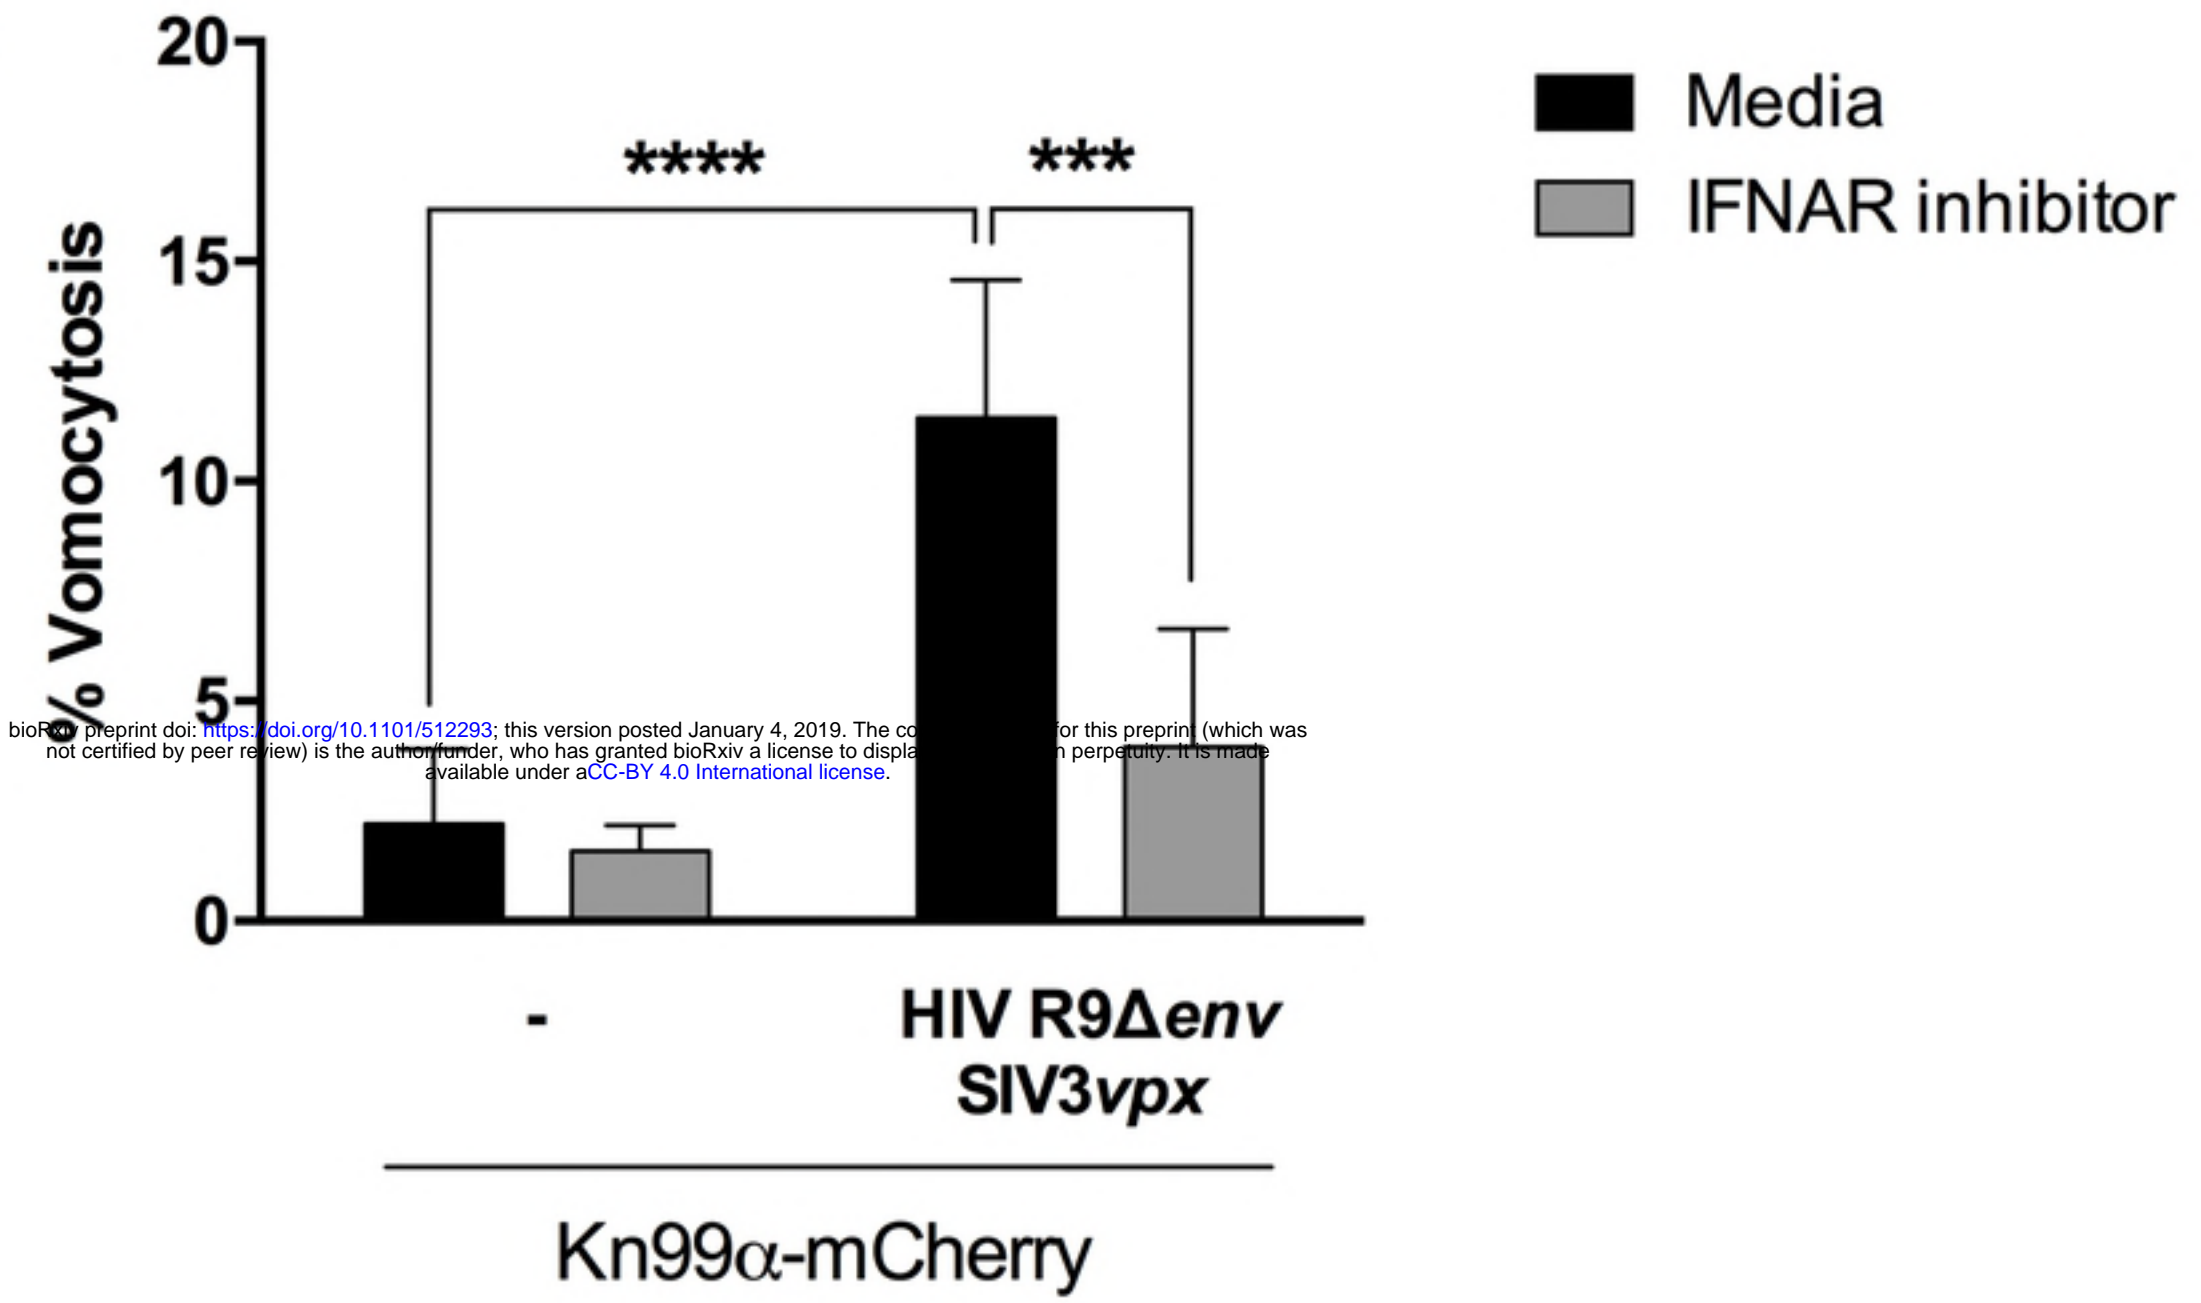**B**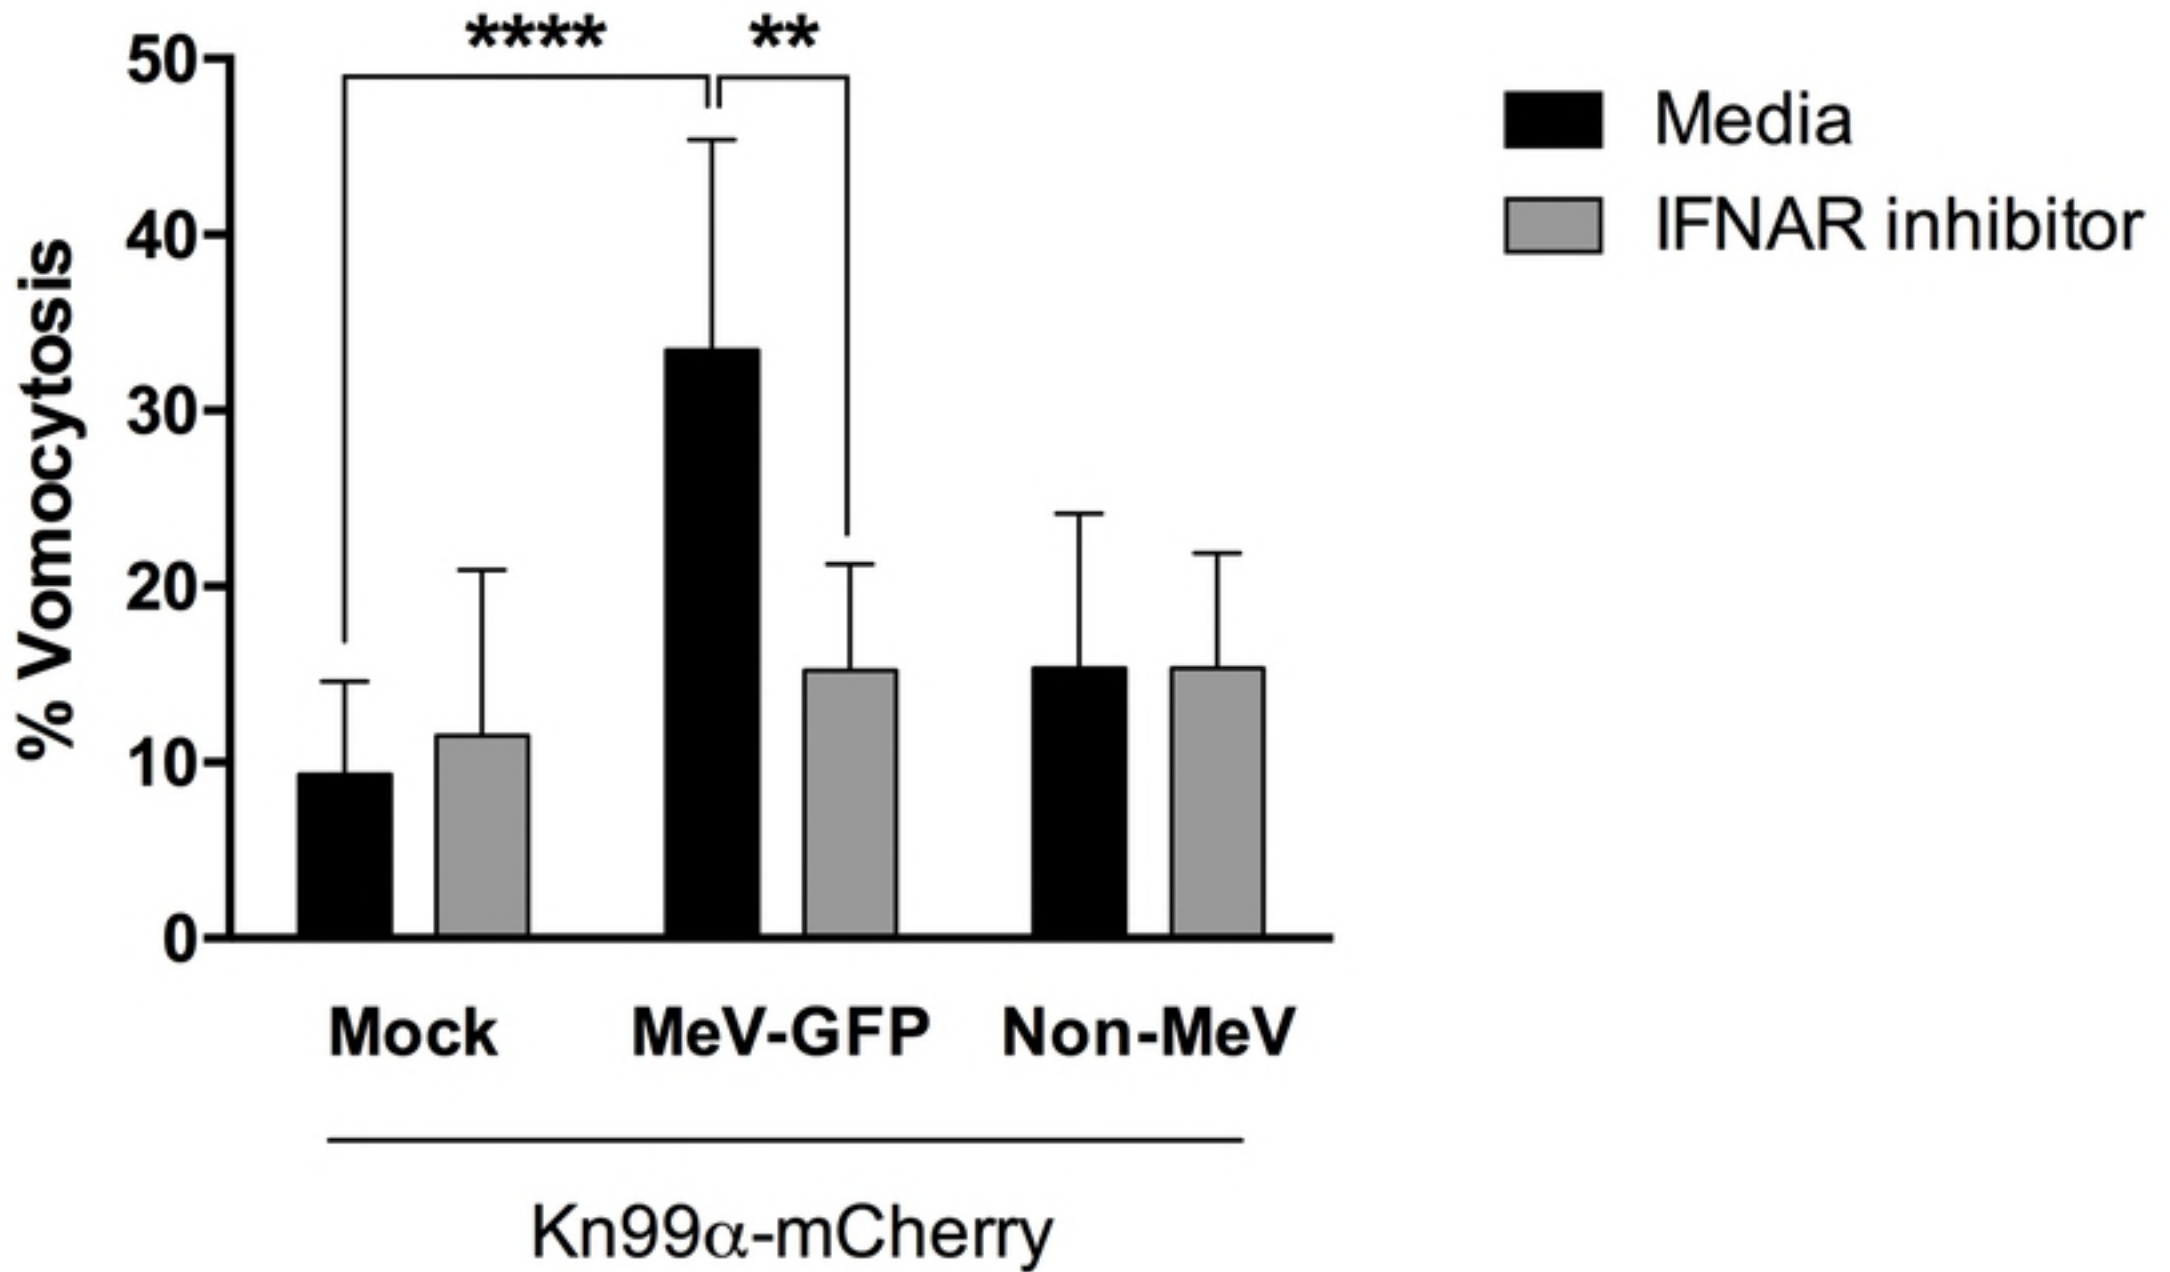

Figure 3
